# Supplementary material for: The interplay between microRNA and alternative splicing of linear and circular RNAs in eleven plant species
Source: Oxford University Press journal article supplement (doi:10.1093/bioinformatics/btz038), 2019-01-21
Supplement: bioinformatics_35_17_3119_s3.zip [file bioinformatics_35_17_3119_s3.zip]

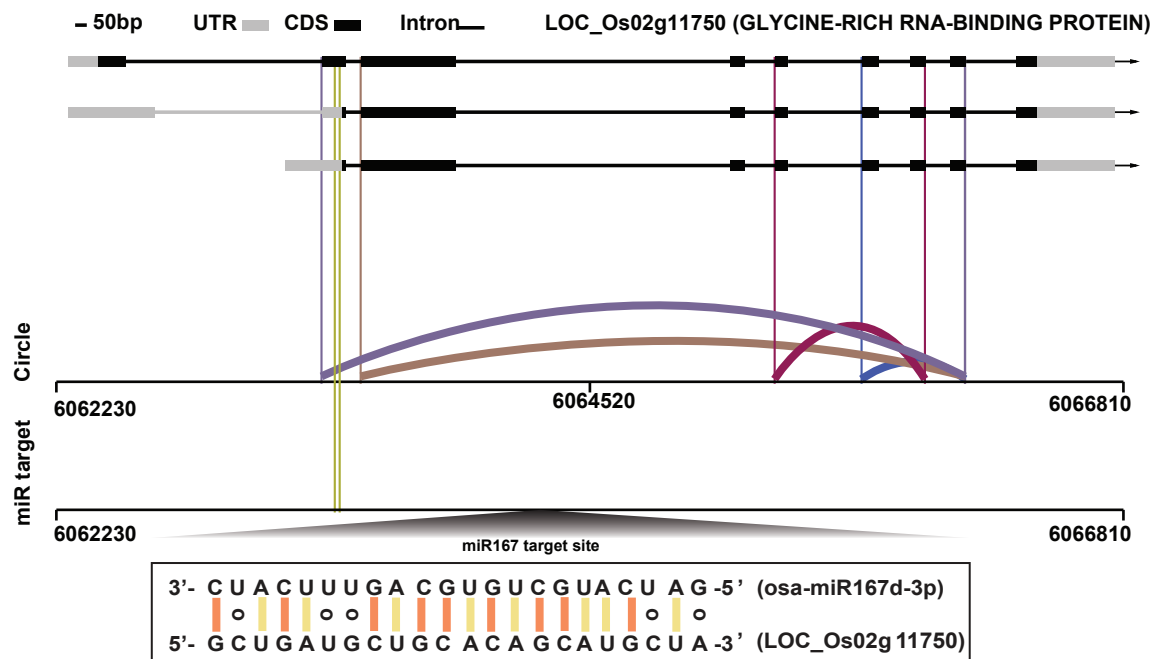

Figure S2. Graphic summary of alternative back-splicing of circular RNA locating across miR167d target site in *Oryza sativa*. The top track shows the structure of LOC\_Os02g11750. Each horizontal box and line represent exon and intron, respectively. The longest circular RNA (chr02:6063368-6066130) has a miR167d target site, however the short isoforms do not contain the miRNA target site. The magnified region shows the sequence of miRNA target site that is present only in the longest transcript (indicated with a green box) and the miR167d sequence.
