# Supplementary material for: The interplay between microRNA and alternative splicing of linear and circular RNAs in eleven plant species
Source: Oxford University Press journal article supplement (doi:10.1093/bioinformatics/btz038), 2019-01-21
Supplement: bioinformatics_35_17_3119_s3.zip [file bioinformatics_35_17_3119_s3.zip]

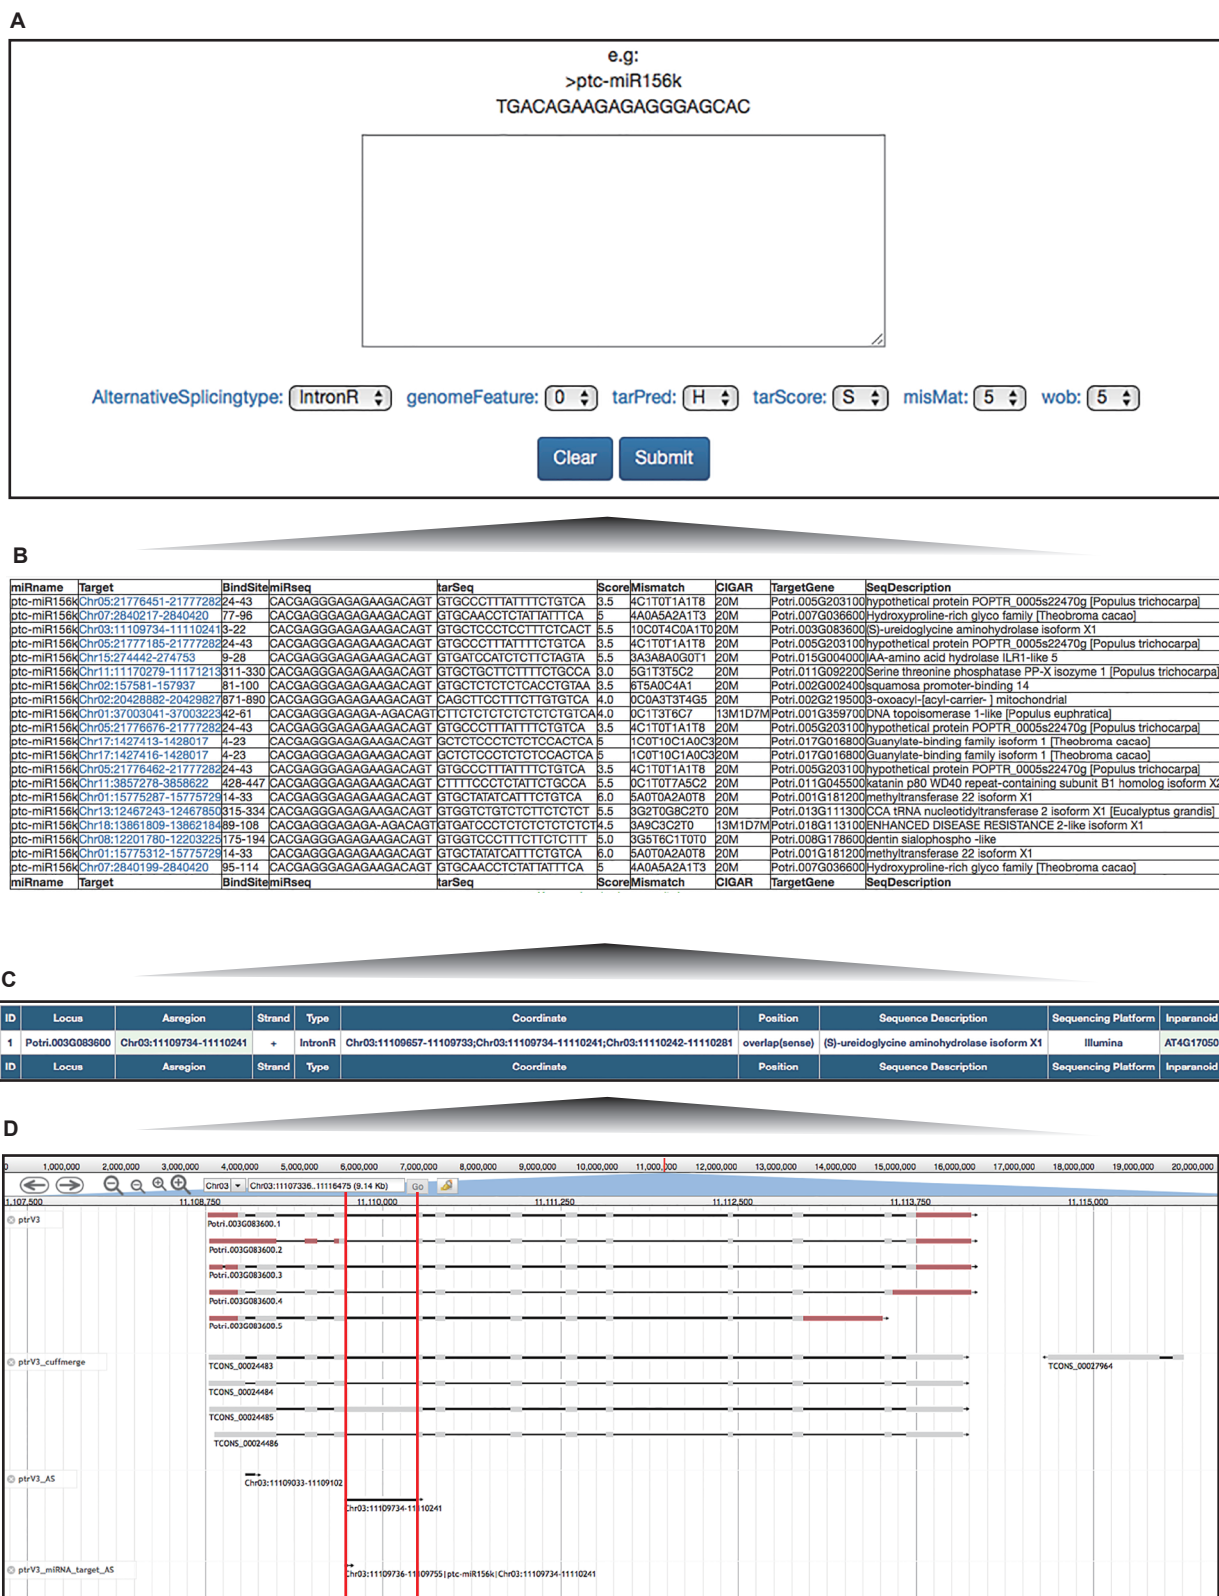

Figure S5. Screenshot of online submission system for *Populus trichocarpa*. (A) The online submission interface for pasting user's own miRNA sequences. (B) The summarized table for prediction results with hyperlinks to more detailed information. (C) and (D) The prediction results for Potri.009G160500, which contains a target site for miR156k in the retained intron.
