# Supplementary material for: The interplay between microRNA and alternative splicing of linear and circular RNAs in eleven plant species
Source: Oxford University Press journal article supplement (doi:10.1093/bioinformatics/btz038), 2019-01-21
Supplement: bioinformatics_35_17_3119_s3.zip [file bioinformatics_35_17_3119_s3.zip]

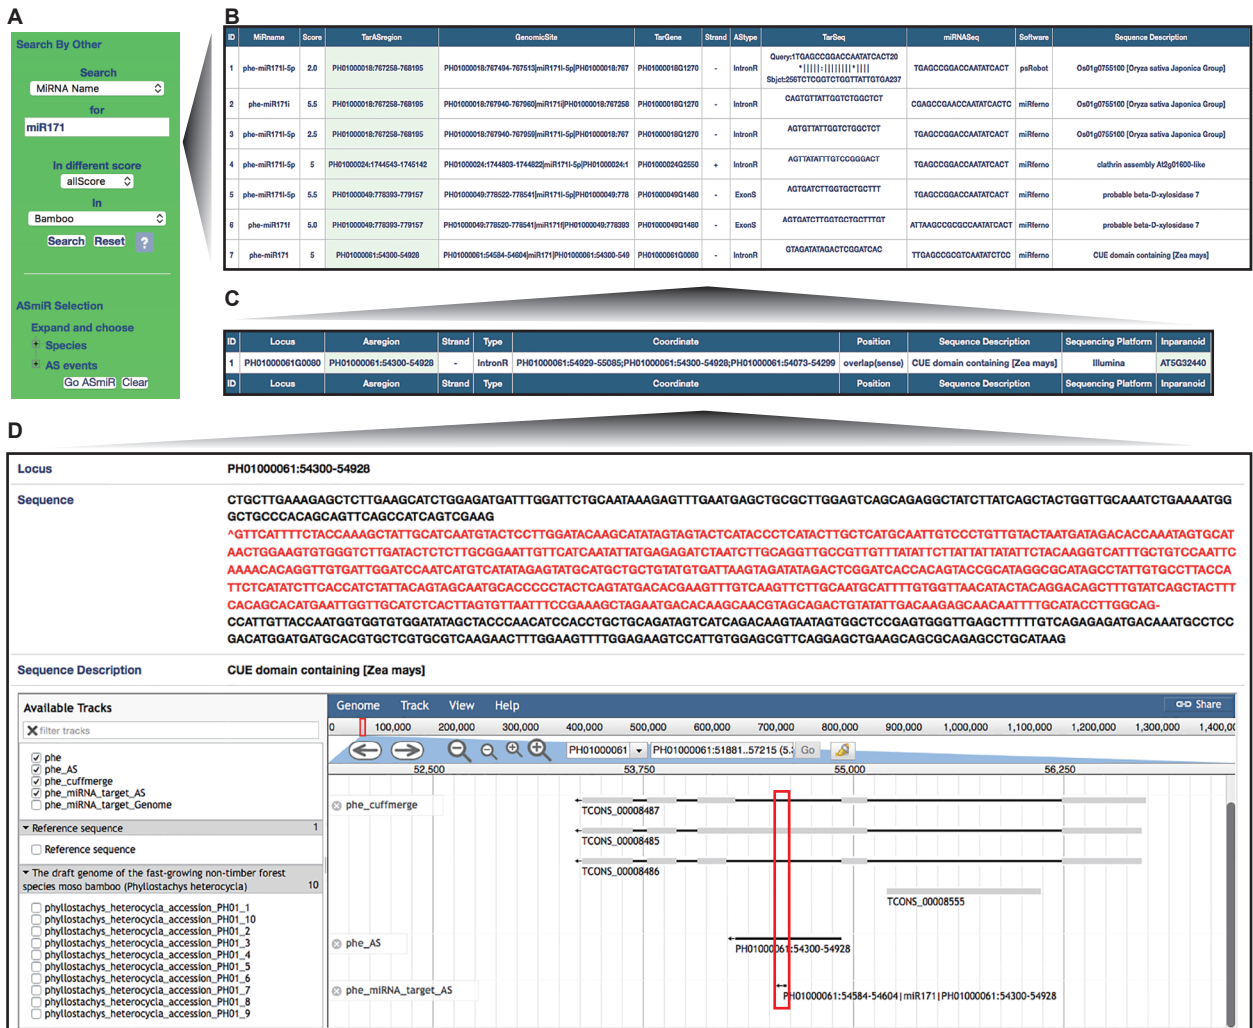

Figure S4. Snapshot of a keyword search result in *Phyllostachys edulis*. (A) The web interface for AS search allowing keyword searches using miRNA name. (B) and (C) The information of the search result with hyperlinks to more detailed information. (D) The JBrowse view of AS together with sequences information hyperlinked to foreign web links for further analysis.
