# Supplementary material for: The interplay between microRNA and alternative splicing of linear and circular RNAs in eleven plant species
Source: Oxford University Press journal article supplement (doi:10.1093/bioinformatics/btz038), 2019-01-21
Supplement: bioinformatics_35_17_3119_s3.zip [file bioinformatics_35_17_3119_s3.zip]

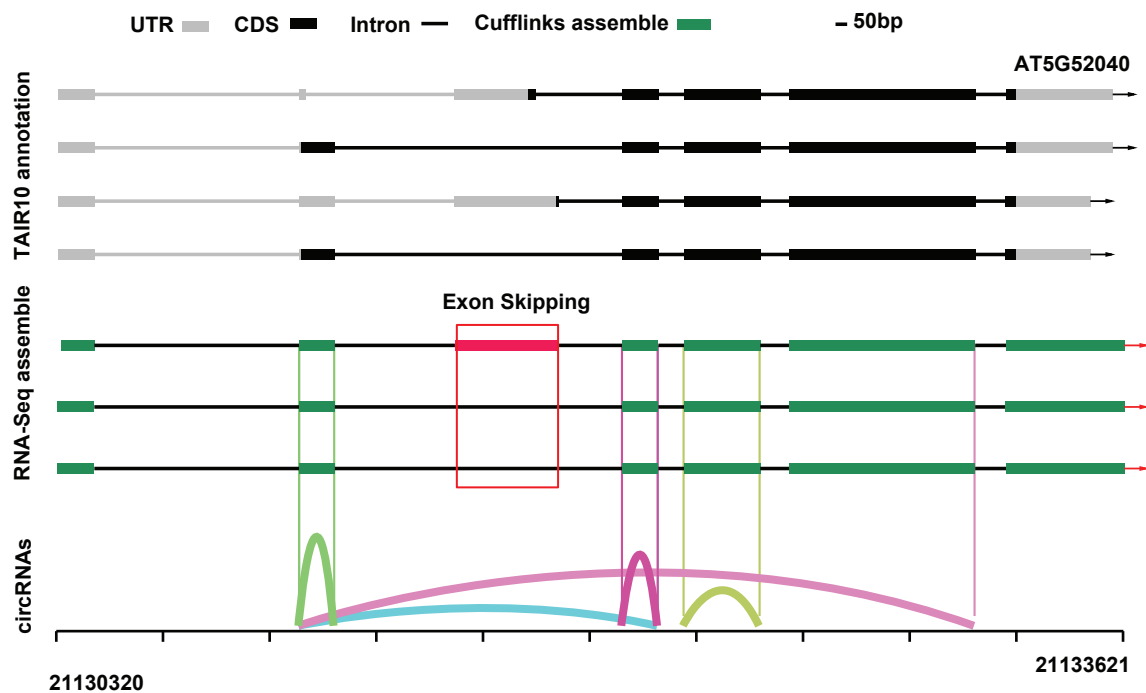

Figure S3. Graphic summary of circRNA overlapped with AS events in *RS41*. The top track shows the exon skipping of *RS41* in exon 3. The circRNAs were shown in the bottom track.
