# Supplementary material for: The interplay between microRNA and alternative splicing of linear and circular RNAs in eleven plant species
Source: Oxford University Press journal article supplement (doi:10.1093/bioinformatics/btz038), 2019-01-21
Supplement: bioinformatics_35_17_3119_s3.zip [file bioinformatics_35_17_3119_s3.zip]

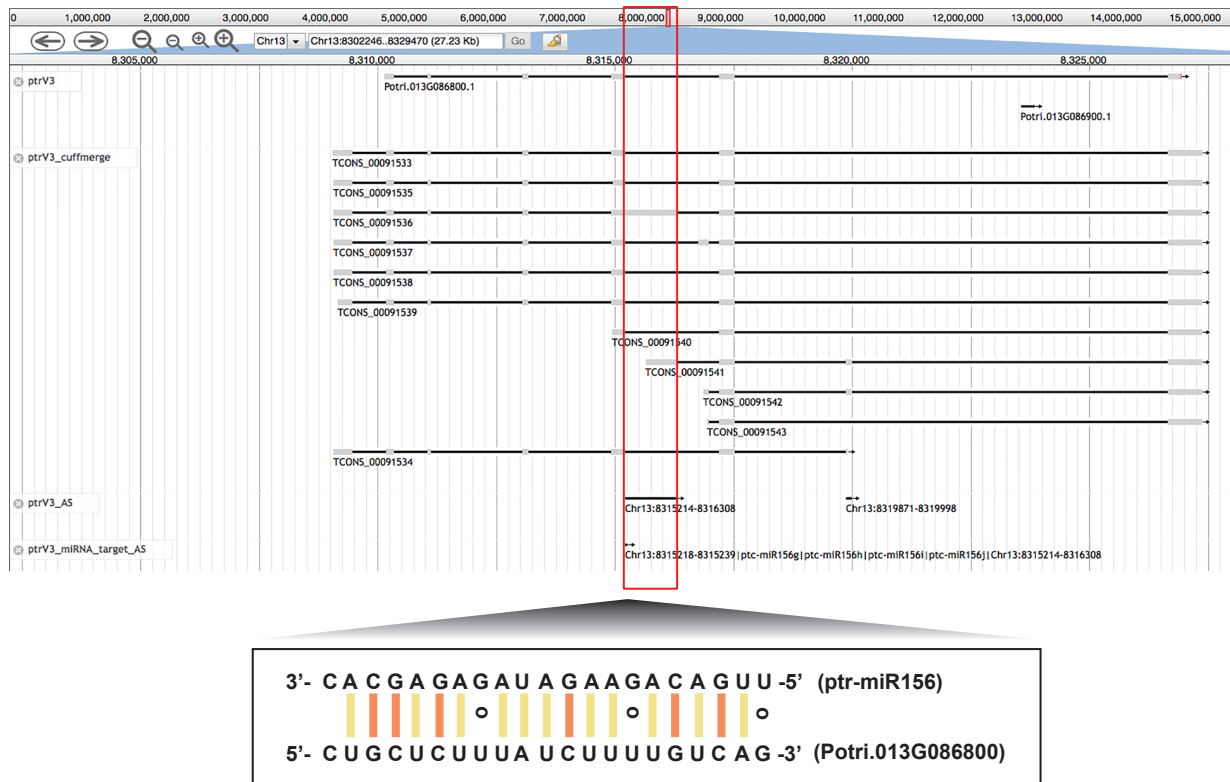

Figure S1. Graphic summary of gain- and loss- of miR156 targets sites by alternative donor site in *P. trichocarpa*. The top track shows the gene structure of Potri.013G086800. Each horizontal box and line represent exon and intron, respectively. The long isoform (TCONS\_00091536) contains a miR156g target site, whereas the short isoform is miR156g-insensitive as it does not harbor the miRNA target sites. The magnified region shows the sequence of miRNA target site in the long transcript (indicated with a red box) and
